# Supplementary material for: Non-targeted N-glycome profiling reveals multiple layers of organ-specific diversity in mice
Source: Springer Nature journal article supplement (doi:10.1038/s41467-024-54134-z), 2024-11-09
Supplement: MOESM1 [file 41467_2024_54134_MOESM1_ESM.pdf]

## Supplementary Information

### Non-targeted N-glycome profiling reveals multiple layers of organ-specific diversity in mice.

Johannes Helm<sup>1\*</sup>, Stefan Mereiter<sup>2,3\*</sup>, Tiago Oliveira<sup>2,3</sup>, Anna Gattinger<sup>3,4</sup>, David M. Markovitz<sup>5</sup>, Josef M. Penninger<sup>2,3,6,7</sup>, Friedrich Altmann<sup>1</sup>, Johannes Stadlmann<sup>1,8</sup>.

#### Affiliations

1. Institute of Biochemistry, Department of Chemistry, University of Natural Resources and Life Sciences (BOKU), Muthgasse 18, 1190 Vienna, Austria.
2. Eric Kandel Institute, Department of Laboratory Medicine, Medical University of Vienna, Spitalgasse 23, 1090 Vienna, Austria.
3. Institute of Molecular Biotechnology of the Austrian Academy of Sciences (IMBA), Vienna BioCenter (VBC), Dr. Bohr-Gasse 3, 1030 Vienna, Austria.
4. Bioinformatics Research Group, University of Applied Sciences Upper Austria, Softwarepark11, 4232 Hagenberg, Austria.
5. Division of Infectious Diseases, Department of Internal Medicine, and the Programs in Immunology, Cellular and Molecular Biology, and Cancer Biology, University of Michigan, Ann Arbor, MI 48109, USA.
6. Department of Medical Genetics, Life Sciences Institute, University of British Columbia, Vancouver Campus, 2350 Health Sciences Mall, Vancouver, BC Canada V6T 1Z3.
7. Helmholtz Centre for Infection Research, Braunschweig, Germany
8. BOKU Core Facility Mass Spectrometry, University of Natural Resources and Life Sciences (BOKU), Muthgasse 18, 1190 Vienna, Austria.

\*These authors contributed equally

## **Table of contents:**

### **Supplementary Figures**

Supplementary Figure 1. Precursor-independent MS/MS-based N-glycome profiling of 20 mouse tissues

Supplementary Figure 2. Comparative N-glycome profiling of 20 mouse tissues

Supplementary Figure 3. Impact of SNOG-score filtering on data quality

Supplementary Figure 4. Impact of SNOG-score filtering on the total ion current (TIC) and number of unique mass bins across all samples

Supplementary Figure 5. Impact of SNOG-score filtering on data quality of the liver 1 data set

Supplementary Figure 6. Empiric determination of the cut-off values for the extended SNOG-scores (eSNOG)

Supplementary Figure 7. Tissue specific expression of specific N-glycan modifications

Supplementary Figure 8. MS/MS supported identification of a N-glycan with the composition Hex<sub>6</sub>HexNAc<sub>6</sub>Fuc<sub>4</sub>GlcA<sub>1</sub> carrying a fucosylated HNK-1 epitope in kidney

Supplementary Figure 9. Profiling the isomeric complexity of the murine N-glycome

Supplementary Figure 10. Additional isomeric profiling of the murine N-glycans.

### **Supplementary Tables**

Supplementary Table 1. MS/MS-based N-glycome profiling – numeric spectral counting results.

Supplementary Table 2. Overview over diagnostic fragment ions used for sub-structural profiling of the mouse N-glycome

Supplementary Table 3. Overview mouse tissue samples used in this study

### **Supplementary Notes**

Supplementary Note 1. Calculation of the SNOG-score

Supplementary Note 2. Calculation of the extended SNOG-scores (eSNOG-score)

## Supplementary Figures

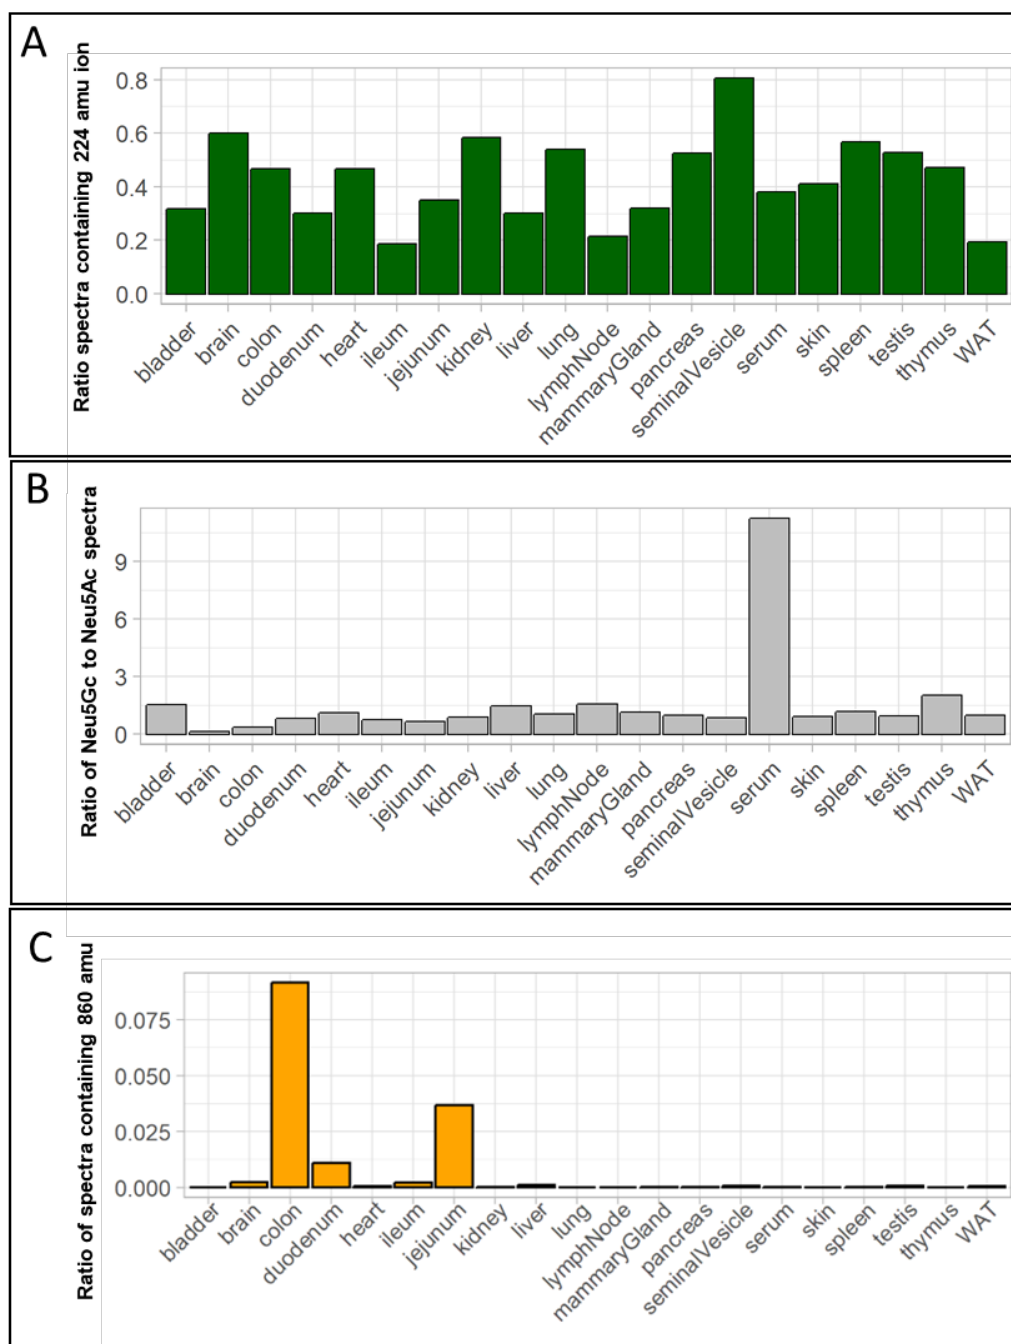

**Supplementary Figure 1. Precursor-independent MS/MS-based N-glycome profiling of 20 mouse tissues.** (A) Relative abundance of MS/MS spectra containing the glycan-specific fragment ion 224.1 amu (reduced HexNAc). (B) Ratio of spectra containing the diagnostic fragment ion for Neu5Gc (290.1 amu) and spectra containing the diagnostic fragment ion for Neu5Ac (274.1 amu). (C) Ratio of spectra containing the fragment ion indicative for the Sda-antigen (860.3 amu). Only N-glycan associated spectra are considered (hence containing the fragment ion 224.1 amu). WAT - white adipose tissue.

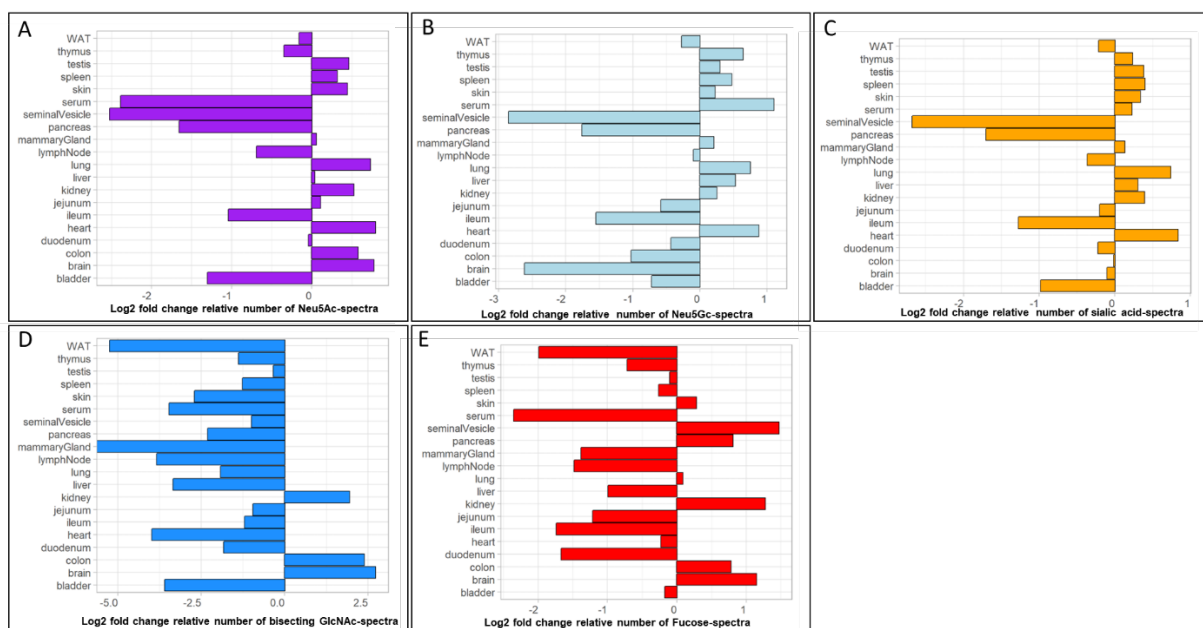

**Supplementary Figure 2. Comparative N-glycome profiling of 20 mouse tissues.** The graphs show the log2-fold change of the number of MS/MS spectra containing a specific diagnostic fragment ions in relation to the mean across all tissues. **(A)** Log2-fold change of the number of MS/MS containing a Neu5Ac-specific fragment ion (274.1 amu) **(B)** Log2-fold change of the number of MS/MS containing a Neu5Gc-specific fragment ion (290.1 amu). **(C)** Log2-fold change of the number of MS/MS containing a Neu5Ac- or Neu5Gc-specific fragment ion (274.1 amu or 290.1 amu). **(D)** Log2-fold change of the number of MS/MS containing a bisecting GlcNAc-specific fragment ion (792.3 amu). **(E)** Log2-fold change of the number of MS/MS containing a fucose-specific fragment ion (512.2 amu). Because of gas-phase re-arrangement of fucose-residues, this fragment ion does not discriminate between core- and distal fucose. Only N-glycan associated spectra (i.e. containing the fragment ion 224.1 amu) were considered. WAT - white adipose tissue.

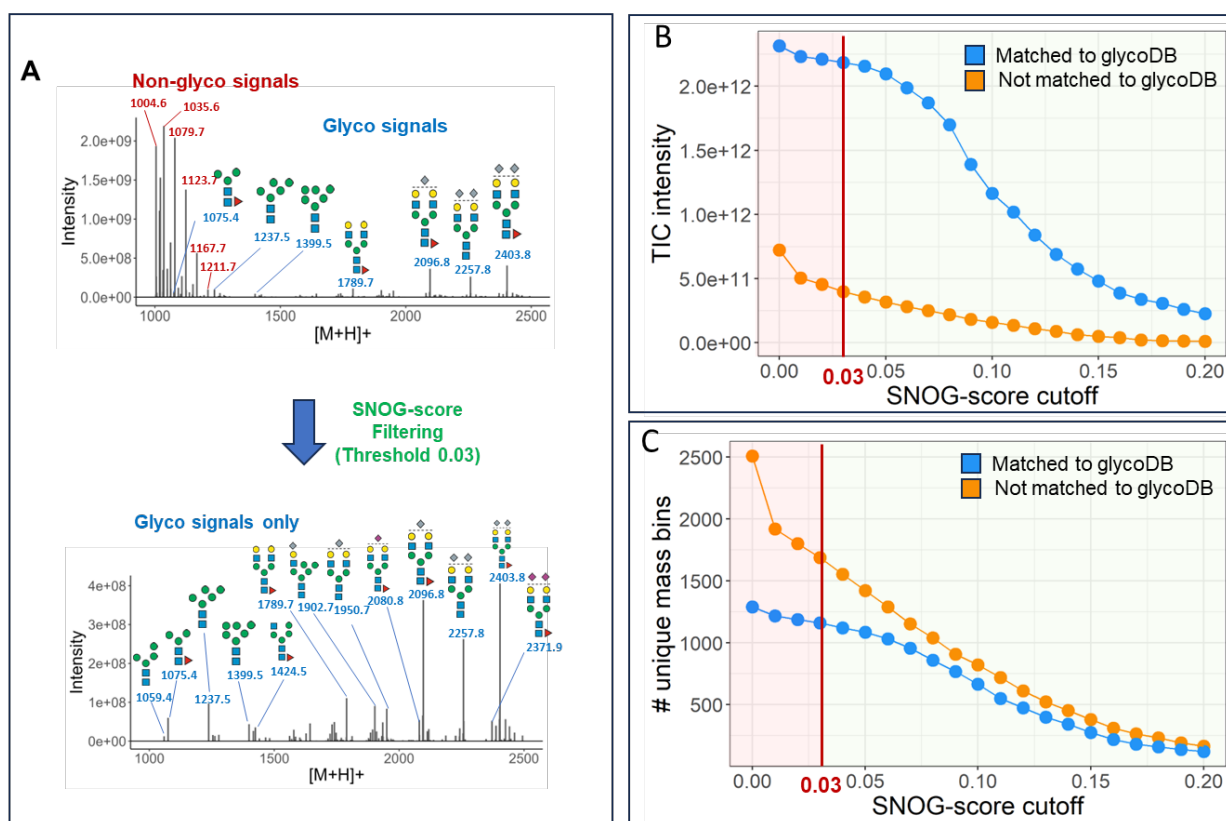

**Supplementary Figure 3. Impact of SNOG-score filtering on data quality.** (A) SNOG-filtering of the lymph node 1 data set. Filtering effectively removes signals derived from contaminants and retains N-glycan associated signals. (B) Impact of different SNOG-score cutoff values on the accumulated total ion current (TIC) of all analyzed samples. (C) Impact of different SNOG-score cutoff values on the number of unique mass-bins across all analyzed samples. Blue dots represent values corresponding to mass bins which have an entry in our glycoDB (including sodium and ammonium adducts), orange dots represent values which have no entry in our glycoDB. N-glycan cartoons depict tentative structure assignments based on composition, using the Symbol Nomenclature for Glycans (SNFG). WAT - white adipose tissue.

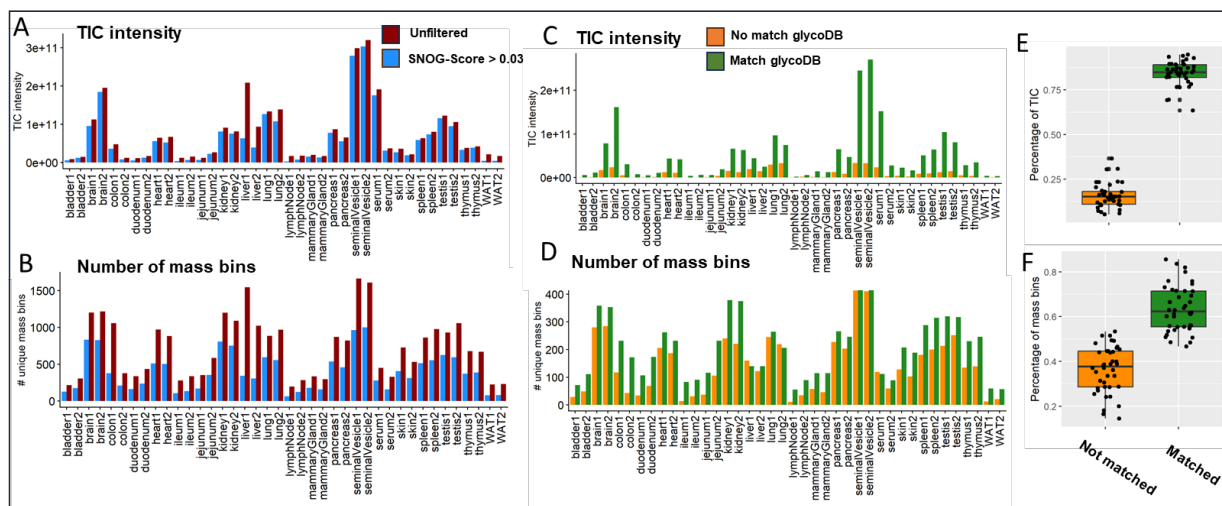

**Supplementary Figure 4. Impact of SNOG-score filtering on the total ion current (TIC) and number of unique mass bins.** (A) Impact of the SNOG-score filtering with a cutoff at 0.03 on the TIC, stratified across all samples. Red bars represent the TIC of the unfiltered data, blue bars represent the filtered data. (B) Impact of the SNOG-score filtering with a cutoff at 0.03 on the number of unique mass bins, stratified across all samples. Red bars represent the TIC of the unfiltered data, blue bars represent the filtered data. (C) Distribution of the TIC of the SNOG-score filtered data set (> 0.03) categorized into mass bins that have an entry in our glycoDB (green) and into mass bins which have no entry in our glycoDB (including sodium and ammonium adducts) (orange) across all samples. (D) Distribution of the number of unique mass bins of the SNOG-score filtered data set (> 0.03) categorized into mass bins that have an entry in our glycoDB (green) and into mass bins which have no entry in our glycoDB (including sodium and ammonium adducts) (orange) across all samples. (E) Boxplots of the percentage compositions of the TIC derived from mass bins which have an entry in our glycoDB (including sodium and ammonium adducts) (green) or have no entry in our glycoDB (orange) across all samples. (F) Boxplots of the percentage compositions of the number of unique mass-bins which have an entry in our glycoDB (including sodium and ammonium adducts) (green) or have no entry in our glycoDB (orange) across all samples. WAT - white adipose tissue.

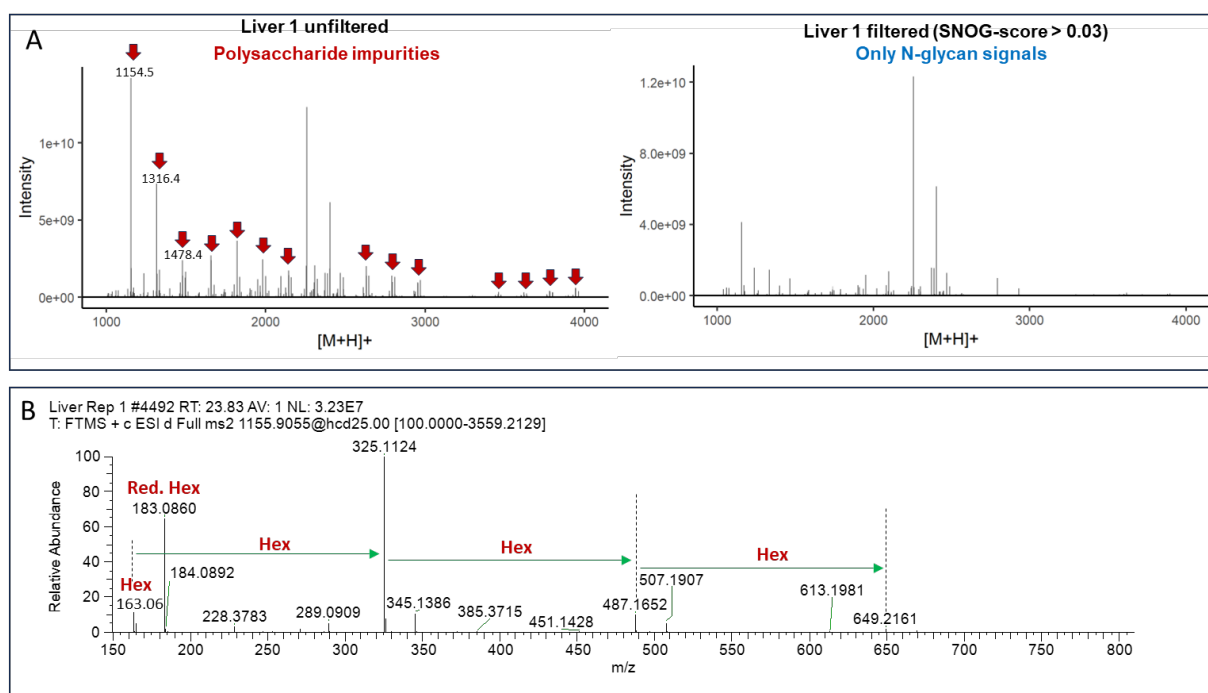





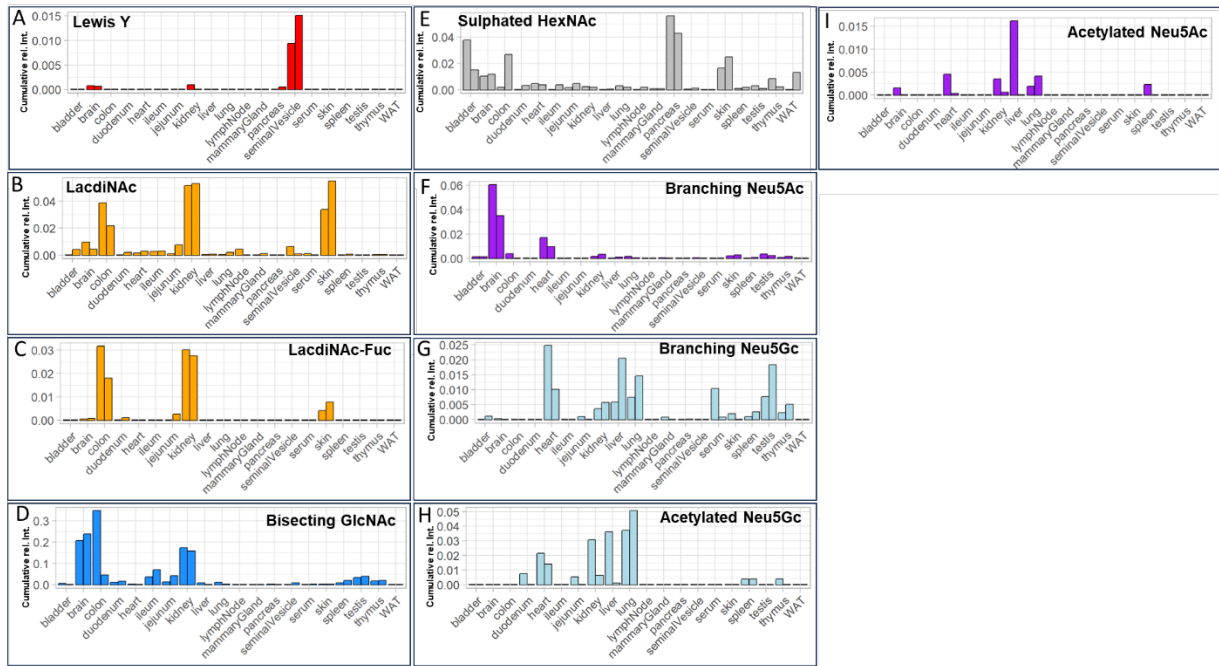

**Supplementary Figure 7. Tissue specific expression of specific N-glycan modifications.** (A) Lewis Y epitope. Comparative analysis of N-glycans carrying the Lewis Y epitope across tissues. (B) LacdiNAc modification. Comparative analysis of N-glycans carrying the LacdiNAc modification across tissues. (C) Fucosylated LacdiNAc modification. Comparative analysis of N-glycans carrying the fucosylated LacdiNAc modification across tissues. (D) Bisecting GlcNAc. Comparative analysis of N-glycans carrying a bisecting GlcNAc across tissues. (E) Sulfated HexNAc. Comparative analysis of N-glycans carrying sulfated GlcNAc across tissues. (F) Branching Neu5Ac. Comparative analysis of N-glycans carrying branching Neu5Ac across tissues. (G) Branching Neu5Gc. Comparative analysis of N-glycans carrying branching Neu5Gc across tissues. (H) Acetylated Neu5Gc. Comparative analysis of N-glycans carrying acetylated Neu5Gc across tissues. (I) Acetylated Neu5Ac. Comparative analysis of N-glycans carrying acetylated Neu5Ac across tissues. All values are normalized to the total glyco-TIC of the respective tissue. WAT - white adipose tissue.

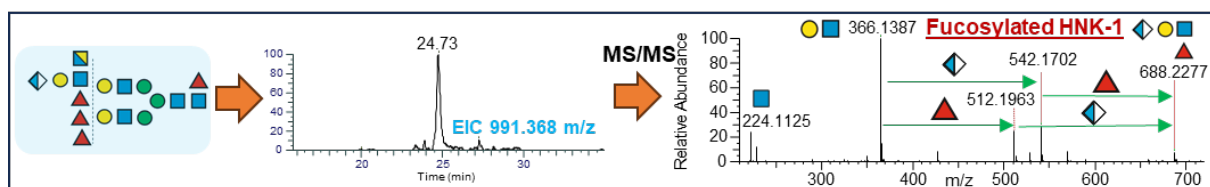

**Supplementary Figure 8. MS/MS supported identification of a N-glycan with the composition Hex<sub>6</sub>HexNAc<sub>6</sub>Fuc<sub>4</sub>GlcA<sub>1</sub> carrying a fucosylated HNK-1 epitope in kidney.**

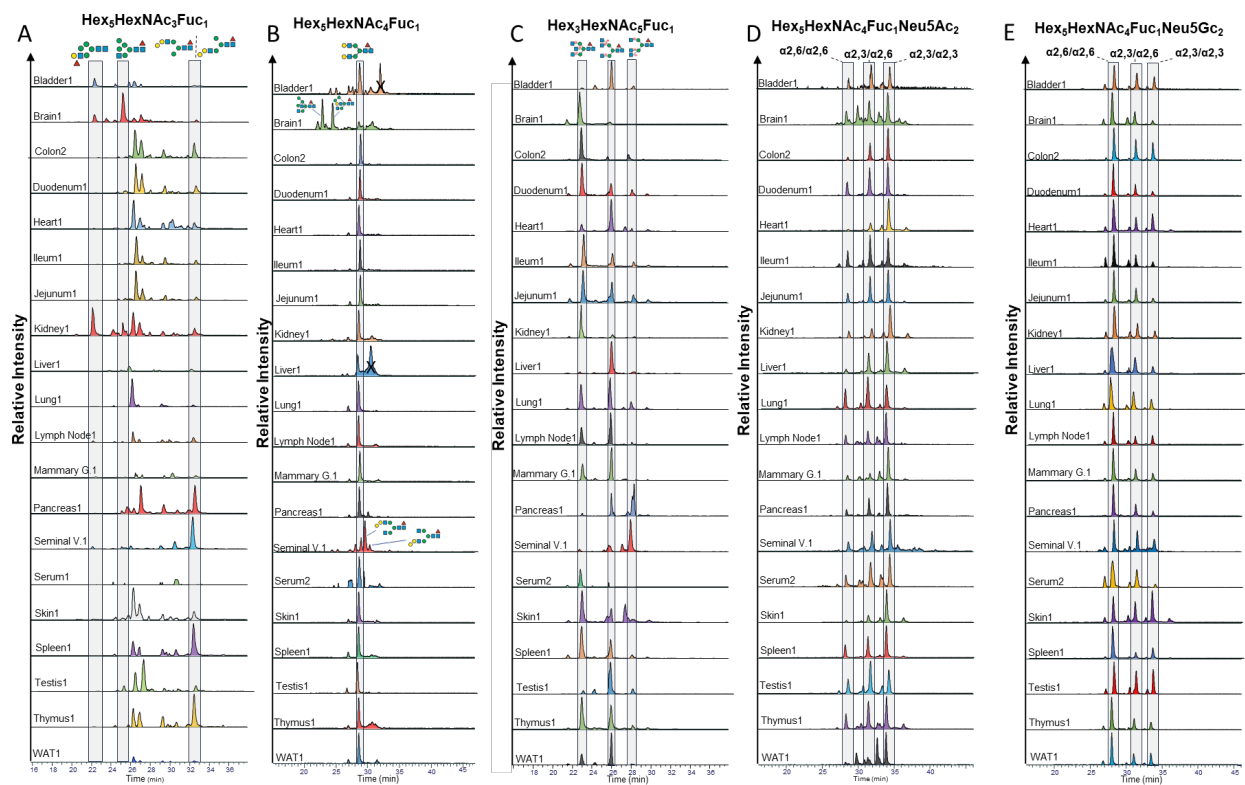

**Supplementary Figure 9. Profiling the isomeric complexity of the murine N-glycome.** The highly isomer-selective stationary phase porous graphitic carbon (PGC) was used to separate even closely related isomers. Already existing N-glycan retention libraries combined with MS/MS data were used to identify the exact structures of the respective isomers. All retention times were normalized to the retention time of the ubiquitous Man5 N-glycan. **(A)** shows the elution profile for the composition Hex<sub>5</sub>HexNAc<sub>3</sub>Fuc<sub>1</sub> across all analyzed tissues. **(B)** shows the elution profile for the composition Hex<sub>5</sub>HexNAc<sub>4</sub>Fuc<sub>1</sub> across all analyzed tissues. **(C)** shows the elution profile for the composition Hex<sub>3</sub>HexNAc<sub>5</sub>Fuc<sub>1</sub> across all analyzed tissues. **(D)** shows the elution profile for the composition Hex<sub>5</sub>HexNAc<sub>4</sub>Fuc<sub>1</sub>Neu5Ac<sub>2</sub> across all analyzed tissues. **(E)** shows the elution profile for the composition Hex<sub>5</sub>HexNAc<sub>4</sub>Fuc<sub>1</sub>Neu5Gc<sub>2</sub> across all analyzed tissues.

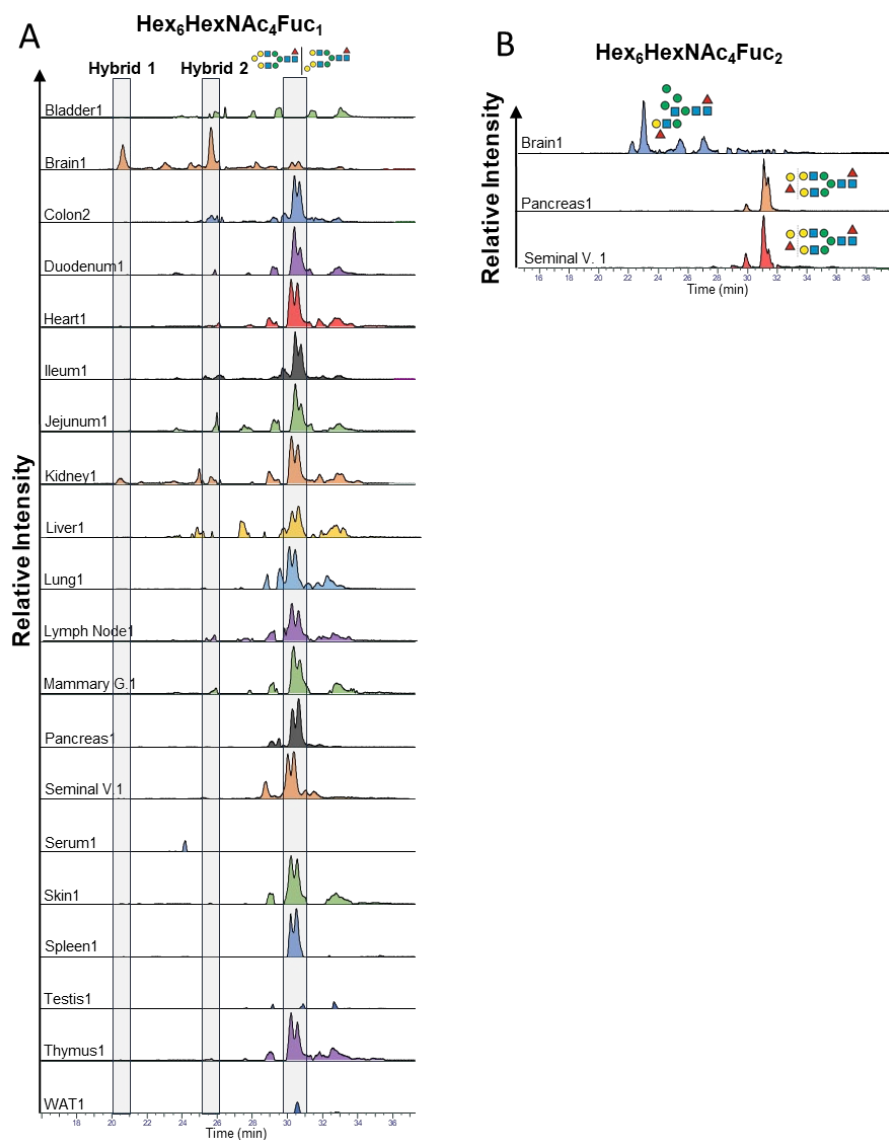

**Supplementary Figure 10. Additional isomeric profiling of the murine N-glycans.** The highly isomer-selective stationary phase porous graphitic carbon (PGC) was used to separate even closely related isomers. Already existing N-glycan retention libraries combined with MS/MS data were used to identify the exact structures of the respective isomers. All retention times were normalized to the retention time of the ubiquitous Man5 N-glycan. **(A)** shows the elution profile for the composition  $\text{Hex}_6\text{HexNAc}_3\text{Fuc}_1$  across all analyzed tissues. **(B)** shows the elution profile for the composition  $\text{Hex}_6\text{HexNAc}_4\text{Fuc}_2$  across brain, pancreas, and seminal vesicle. WAT - white adipose tissue.

## Supplementary Tables

**Supplementary Table 1.** MS/MS-based N-glycome profiling – Numeric spectral counting results.

| Tissue           | Replicate | Total number of MS/MS spectra | Glyco-associated | Neu5Ac-associated | Neu5Gc-associated | Fucose-associated | SDA-associated | Bisecting GlcNAc-associated |
|------------------|-----------|-------------------------------|------------------|-------------------|-------------------|-------------------|----------------|-----------------------------|
| WAT              | 1         | 9151                          | 1853             | 507               | 1853              | 129               | 0              | 0                           |
|                  | 2         | 9371                          | 1678             | 460               | 1678              | 138               | 0              | 0                           |
| Bladder          | 1         | 8952                          | 2513             | 317               | 2513              | 409               | 0              | 0                           |
|                  | 2         | 8941                          | 3114             | 585               | 3114              | 592               | 0              | 0                           |
| Brain            | 1         | 13691                         | 7556             | 5180              | 7556              | 5740              | 11             | 227                         |
|                  | 2         | 13943                         | 8983             | 6159              | 8983              | 6322              | 27             | 504                         |
| Colon            | 1         | 11920                         | 6341             | 4781              | 6341              | 4117              | 963            | 234                         |
|                  | 2         | 12768                         | 4874             | 2006              | 4874              | 1806              | 57             | 10                          |
| Duodenum         | 1         | 12490                         | 2870             | 819               | 2870              | 199               | 22             | 1                           |
|                  | 2         | 12866                         | 4728             | 1757              | 4728              | 492               | 43             | 9                           |
| Heart            | 1         | 12753                         | 6228             | 3874              | 6228              | 1474              | 3              | 2                           |
|                  | 2         | 12502                         | 5518             | 3193              | 5518              | 1333              | 0              | 1                           |
| Ileum            | 1         | 12305                         | 2013             | 293               | 2013              | 151               | 5              | 5                           |
|                  | 2         | 12048                         | 2475             | 453               | 2475              | 201               | 3              | 5                           |
| Jejunum          | 1         | 12444                         | 3121             | 1056              | 3121              | 236               | 108            | 2                           |
|                  | 2         | 13547                         | 5886             | 2633              | 5886              | 924               | 191            | 29                          |
| Kidney           | 1         | 14147                         | 8032             | 4118              | 8032              | 6350              | 1              | 233                         |
|                  | 2         | 13568                         | 8069             | 4266              | 8069              | 6220              | 1              | 191                         |
| Liver            | 1         | 14913                         | 4741             | 1271              | 4741              | 552               | 3              | 0                           |
|                  | 2         | 13686                         | 3808             | 1472              | 3808              | 591               | 5              | 0                           |
| Lung             | 1         | 13503                         | 8002             | 4980              | 8002              | 2211              | 0              | 16                          |
|                  | 2         | 13472                         | 6494             | 4019              | 6494              | 2221              | 0              | 10                          |
| Lymph Node       | 1         | 8566                          | 1271             | 190               | 1271              | 116               | 0              | 0                           |
|                  | 2         | 10336                         | 2719             | 632               | 2719              | 271               | 0              | 0                           |
| Mammary Gland    | 1         | 10094                         | 3312             | 1094              | 3312              | 365               | 1              | 0                           |
|                  | 2         | 10488                         | 3221             | 1271              | 3221              | 414               | 0              | 0                           |
| Pancreas         | 1         | 13959                         | 7520             | 911               | 7520              | 3380              | 0              | 11                          |
|                  | 2         | 13493                         | 6815             | 1150              | 6815              | 3773              | 0              | 1                           |
| Seminal Vesicles | 1         | 14848                         | 11716            | 767               | 11716             | 10576             | 7              | 13                          |
|                  | 2         | 14855                         | 12181            | 1149              | 12181             | 10951             | 11             | 34                          |
| Serum            | 1         | 12924                         | 5348             | 462               | 5348              | 340               | 0              | 3                           |
|                  | 2         | 8826                          | 2866             | 139               | 2866              | 127               | 0              | 1                           |
| Skin             | 1         | 12932                         | 5231             | 2441              | 5231              | 1780              | 0              | 6                           |
|                  | 2         | 12454                         | 5127             | 2385              | 5127              | 1444              | 0              | 2                           |
| Spleen           | 1         | 13283                         | 7280             | 3832              | 7280              | 1845              | 0              | 17                          |
|                  | 2         | 13551                         | 7910             | 4373              | 7910              | 2263              | 1              | 25                          |
| Testis           | 1         | 14581                         | 7475             | 4309              | 7475              | 2247              | 7              | 54                          |
|                  | 2         | 14554                         | 7840             | 4167              | 7840              | 2186              | 3              | 24                          |
| Thymus           | 1         | 12653                         | 5720             | 1805              | 5720              | 1167              | 0              | 15                          |
|                  | 2         | 13303                         | 6437             | 2076              | 6437              | 1081              | 0              | 17                          |

**Supplementary Table 2.** Diagnostic fragment ions and associated eSNOG-score cutoffs used for sub-structural profiling of N-glycans.

| <b>Modification</b>                 | <b>Diagnostic fragment ions [H<sup>+</sup>] [amu]</b> | <b>eSNOG-score cutoff</b> |
|-------------------------------------|-------------------------------------------------------|---------------------------|
| Neu5Ac                              | 292.1072 & 274.0921                                   | 0.025 & 0.05              |
| Neu5Gc                              | 308.0976 & 290.087                                    | 0.025 & 0.05              |
| branching Neu5Ac                    | 495.1821                                              | 0.025                     |
| branching Neu5Gc                    | 511.177                                               | 0.025                     |
| Neu5Ac-associated di-sialyl Lewis C | 495.1821 & 948.3303                                   | 0.025 & 0.005             |
| Neu5Gc-associated di-sialyl Lewis C | 511.177 & 980.3201                                    | 0.025 & 0.005             |
| Acetylated Neu5Ac                   | 334.1133 & 316.1027                                   | 0.005 & 0.005             |
| Acetylated Neu5Gc                   | 350.1082 & 332.0976                                   | 0.005 & 0.005             |
| Antennary fucose                    | 512.1974                                              | 0.075                     |
| Alpha-galactose                     | 528.1923                                              | 0.35                      |
| HNK-1 epitope                       | 542.1716                                              | 0.05                      |
| Bisecting GlcNAc                    | 792.3234                                              | 0.025                     |
| LacdiNAc                            | 407.1661                                              | 0.04                      |
| Fucosylated LacdiNAc                | 407.1661 & 553.224                                    | 0.04 & 0.01               |
| Lewis Y                             | 512.1974 & 658.2553                                   | 0.2 & 0.07                |
| Sulphated HexNAc                    | 284.0435                                              | 0.01                      |
| Reduced N-glycan                    | 224.1118                                              | 0.03                      |

**Supplementary Table 3.** Overview mouse tissue samples used in this study.

| Organ                | Female | Male  | Extracted section or part                     | Opened and cleaned with PBS |
|----------------------|--------|-------|-----------------------------------------------|-----------------------------|
| Ear skin             | n = 2  |       | Slice                                         |                             |
| Pancreas             | n = 2  |       | Whole                                         |                             |
| Duodenum             | n = 2  |       | Middle section                                | Yes                         |
| Jejunum              | n = 2  |       | Middle section                                | Yes                         |
| Ileum                | n = 2  |       | Middle section                                | Yes                         |
| Colon                | n = 2  |       | Middle section                                | Yes                         |
| Spleen               | n = 2  |       | Whole                                         |                             |
| Kidney               | n = 2  |       | Left                                          |                             |
| Liver                | n = 2  |       | Whole                                         |                             |
| Brain                | n = 2  |       | Whole                                         |                             |
| White adipose tissue | n = 2  |       | Epididymal                                    |                             |
| Mammary glands       | n = 2  |       | Inguinal mammary fat pad excluding lymph node |                             |
| Lymph node           | n = 2  |       | Inguinal                                      |                             |
| Thymus               | n = 2  |       | Whole                                         |                             |
| Testicle             |        | n = 2 | Left                                          |                             |
| Bladder              |        | n = 2 | Whole                                         | Yes                         |
| Serum                |        | n = 2 | Submandibular bleeding                        |                             |
| Seminal vesicle      |        | n = 2 | Left                                          |                             |

## Supplementary Notes

### Supplementary Note 1. Calculation of the SNOG-score

The SNOG-score is a metric utilized to effectively differentiate signals originating from N-glycans from those originating from contaminants, such as polysaccharides. In experiments involving porous graphitic carbon (PGC)-LC-MS/MS, N-glycans are commonly reduced. The resulting reduced GlcNAc fragment ion (224.1 amu) serves as a diagnostic marker for N- (or O)-glycans. To compute the SNOG-score specific to mass bins (0.01 Da mass bins), the mean relative intensity of the 224.1 amu fragment ion is calculated across all MS/MS spectra within each precursor mass bin. This calculation is performed on a per-sample basis across all detected mass bins. Mass bins with a SNOG-score exceeding 0.03 are selected to construct a sample-specific target list, from which precursor-intensity information is retrieved.

### Supplementary Note 2. Calculation of the extended SNOG-scores

The extended SNOG-scores (eSNOG) serve to categorize N-glycans based on sub-structural characteristics such as Neu5Ac-sialylation, antenna-fucosylation, or GlcNAc-sulfation. These scores are calculated in a similar manner to the original SNOG-score. Specifically, the mean relative intensity of one or more diagnostic fragments, which are specific to the modification of interest, is calculated across all MS/MS spectra within the corresponding precursor mass bin. This calculation is performed on a per-sample basis across all identified mass bins. The cutoff values for different eSNOG-scores vary depending on the specific modification and have been determined empirically (Supplementary Table 2).
